# Supplementary material for: A scalable microfluidic chamber array for sample-loss-free and bubble-proof sample compartmentalization by simple pipetting
Source: Royal Society of Chemistry journal article supplement (doi:10.1039/d0lc00348d), 2020-01-01
Supplement: d0lc00348d1.pdf [file d0lc00348d1.pdf]

## **Supplementary materials for**

### **A scalable microfluidic chamber array for sample-loss-free and bubble-proof sample compartmentalization with a simple pipetting**

**This PDF file includes:**

- Table S1. List of LAMP primer sequences.
- Figure S1. Effects of the chamber depth and the channel width to the success rate.
- Figure S2. Effect of the concentration of Triton X-100 to the success rate.

**Other Supplementary Material for this manuscript includes the following:**

- Video. S1. Working principle of each chamber.
- Video. S2. Sample partitioning process.
- Video. S3. Chamber filling process of the flat, the arc, and the triangle design.
- Video. S4. Bubble elimination process.

**Table S1.** List of LAMP primer sequences

| Target | Primer | Sequences (5'-3')                                  |
|--------|--------|----------------------------------------------------|
| Kpn    | F3     | ATACAAAAACACCAGTGTAGG                              |
|        | B3     | GCCGCCAGTTTGTTCAG                                  |
|        | FIP    | CGTTGAGATTTGCGAAGTACCAAGAATCAAATATGCTGCAAATGT<br>G |
|        | BIP    | CAAACGCATAATAAGCAGGTGATTTTCGGAGGTGATGTTTTTCGGTC    |
|        | Loop F | TGCCCCGCCATC                                       |
|        | Loop B | ATCATATCGTTCGGCT                                   |

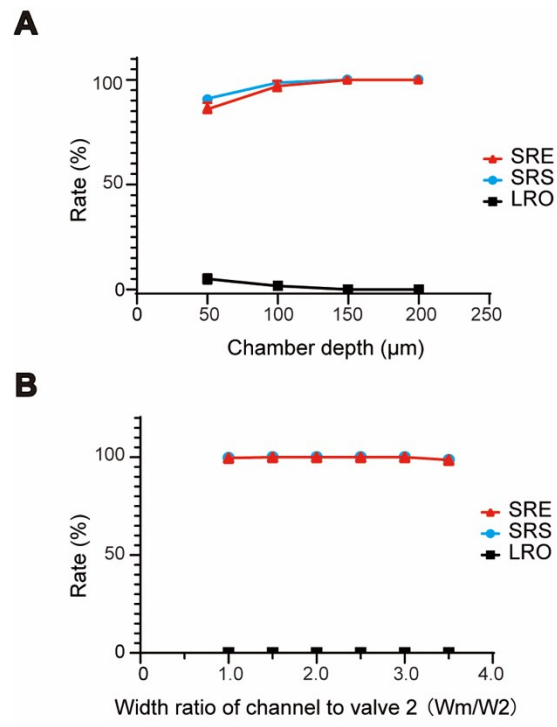

**Figure S1.** Effects of the chamber depth and the channel width to SRE, SRS and LRO. These two parameters have negligible effects to the success rate of sample partitioning.

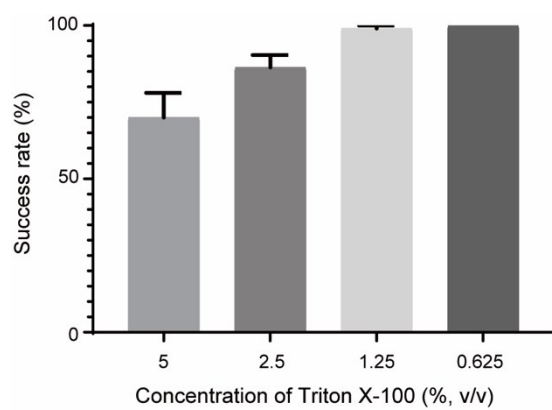

**Figure S2.** Effect of the concentration of Triton X-100 to the success rate of the chip loading. The success rate remains 100% when the concentration of Triton X-100 is less than 1.25%.
